# Supplementary material
Source: PubMed Central journal article supplement (PMC4846549)
Supplement: NIHMS764341-supplement-1.pdf [file NIHMS764341-supplement-1.pdf]

## Supplemental Material

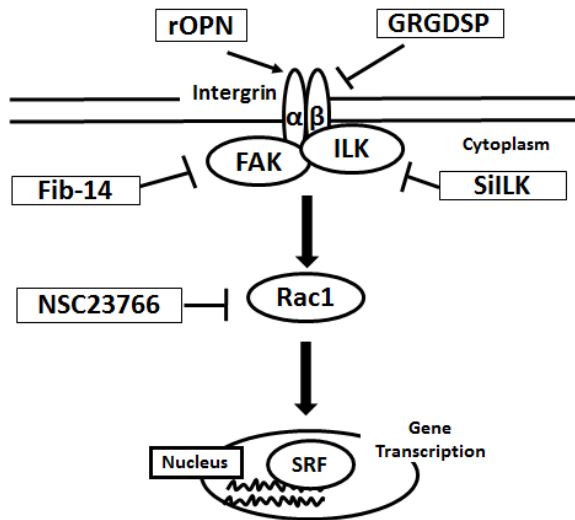

Supplemental Figure I. Proposed pathway in the present study.

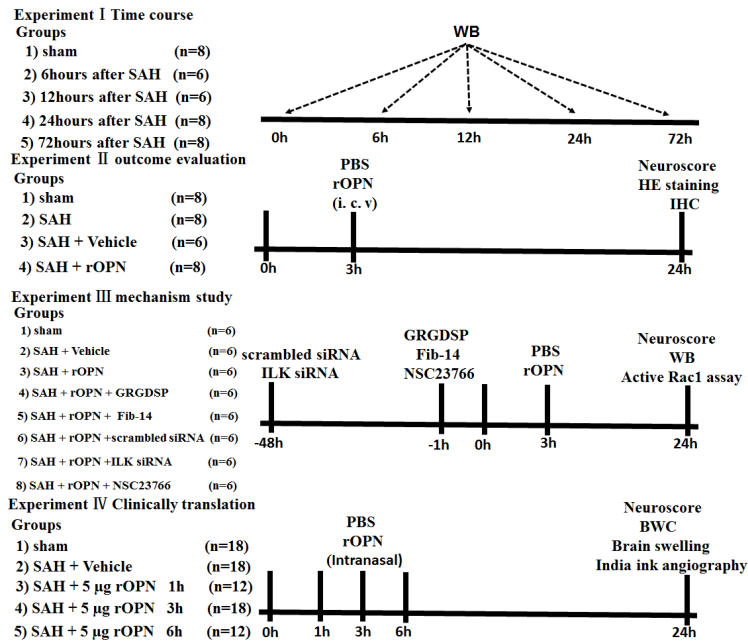

Supplemental Figure II. Experimental design and animal groups' classification.

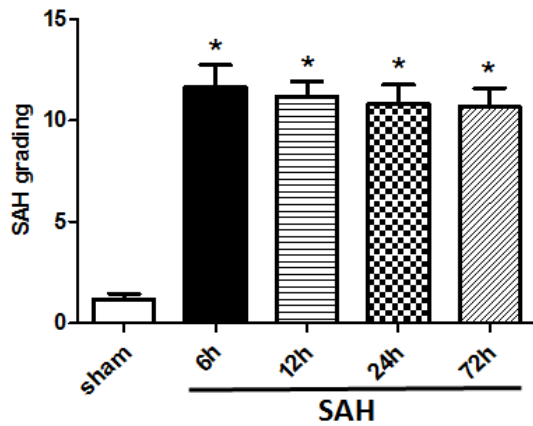

**Supplemental Figure III.** SAH grading of each group after SAH.

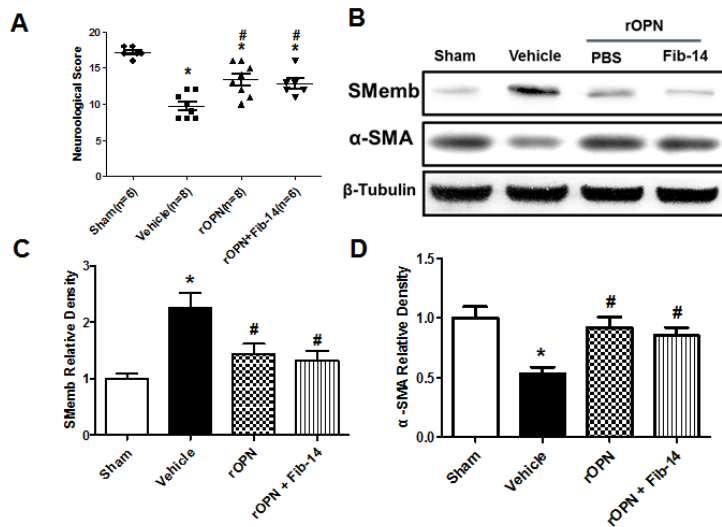

**Supplemental Figure IV.** Modified Garcia test in indicated groups 24 hours following SAH (**A**). Expression change of alpha-SMA, SMemb in the cerebral vessels 24 hours following SAH (**B**). Quantitative analysis of SMemb (**C**) and

alpha-SMA (D). Relative densities have been normalized against the sham group. n=6 rats per group, \*P<0.05 vs. Sham; #P<0.05 vs vehicle. &P<0.05 vs rOPN.

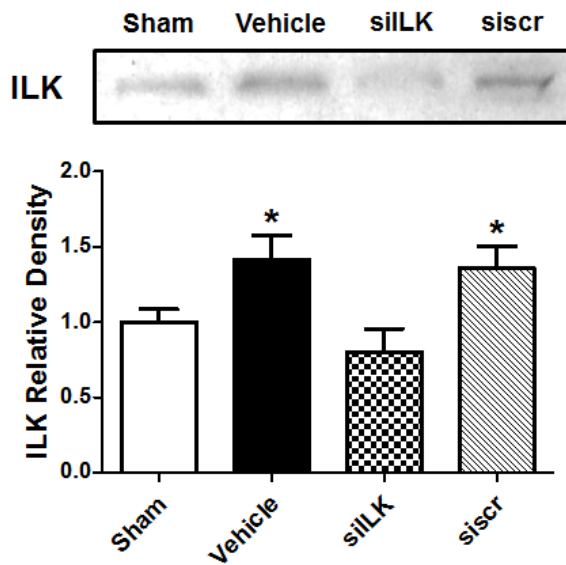

**Supplemental Figure V.** Inhibition effect of ILK siRNA. Expression change of ILK in the cerebral vessels 24 hours following SAH (A). Quantitative analysis of ILK (B). Relative densities have been normalized against the sham group. n=6 rats per group, \*P<0.05 vs. SiILK.
